# Supplementary material
Source: PubMed Central journal article supplement (PMC3762469)
Supplement: NIHMS477277-supplement-supplement_1.pdf [file NIHMS477277-supplement-supplement_1.pdf]

**TABLE S1** Intrinsic Functional Connectivity (iFC) Secondary Analysis Group Comparisons (Major Depressive Disorder [MDD] vs. Controls) and Correlations With MDD and Anhedonia Severity (MDD Only)

| Region                               | Side  | Connectivity Peak                  | Cluster Size | Peak (MNI) |     |     | Peak Z | p                      |
|--------------------------------------|-------|------------------------------------|--------------|------------|-----|-----|--------|------------------------|
|                                      |       |                                    |              | X          | Y   | Z   |        |                        |
| MDD > Controls                       |       |                                    |              |            |     |     |        |                        |
| Caudate                              | Left  | dmPFC                              | 2,224        | 10         | 40  | 44  | 4.50   | $2.03 \times 10^{-6}$  |
|                                      | Right | dmPFC and ACC                      | 6,273        | -16        | 42  | 30  | 4.99   | $8.64 \times 10^{-12}$ |
| Putamen                              | Left  | dmPFC                              | 654          | 6          | 26  | 48  | 3.92   | $4.77 \times 10^{-3}$  |
|                                      | Right | dmPFC                              | 1,419        | 4          | 38  | 46  | 4.41   | $1.39 \times 10^{-4}$  |
| Nucleus accumbens                    | Right | dmPFC and ACC                      | 2,594        | -22        | 46  | 26  | 4.59   | $1.79 \times 10^{-7}$  |
| Controls > MDD                       |       |                                    |              |            |     |     |        |                        |
| Caudate                              | Left  | Superior temporal lobe             | 1,530        | -64        | -24 | 14  | 4.54   | $8.82 \times 10^{-5}$  |
|                                      | Right | Occipital fusiform cortex          | 1,444        | -30        | -78 | -16 | 4.36   | $7.12 \times 10^{-4}$  |
|                                      | Right | Temporal/occipital fusiform cortex | 1,209        | 42         | -62 | -22 | 3.92   | $2.42 \times 10^{-3}$  |
| Putamen                              | Right | Cuneal cortex                      | 1,620        | 28         | -82 | 30  | 4.67   | $2.97 \times 10^{-4}$  |
|                                      | Left  | Lateral occipital cortex           | 1,261        | 60         | -62 | 16  | 4.70   | $2.37 \times 10^{-5}$  |
|                                      | Right | Lateral occipital cortex           | 2,879        | 46         | -84 | -4  | 4.13   | $5.76 \times 10^{-8}$  |
| MDD: Negative CDRS-R Correlations    |       |                                    |              |            |     |     |        |                        |
| Caudate                              | Left  | Precuneus                          | 994          | -4         | -62 | 64  | 4.49   | $1.08 \times 10^{-3}$  |
|                                      | Right | Precuneus                          | 550          | -6         | -64 | 58  | 3.48   | $9.47 \times 10^{-3}$  |
| MDD: Positive Anhedonia Correlations |       |                                    |              |            |     |     |        |                        |
| Caudate                              | Left  | Middle occipital gyrus             | 563          | -38        | -70 | 6   | 3.49   | < 0.001                |
|                                      | Right | Supplementary motor area           | 559          | -10        | -24 | 62  | 3.65   | 0.001                  |
| Putamen                              | Right | Perigenual ACC                     | 618          | -10        | 16  | 26  | 4.08   | 0.002                  |

Note: ACC = anterior cingulate cortex; CDRS-R = Children's Depression Rating Scale-Revised; dmPFC = dorsomedial prefrontal cortex; MNI = Montreal Neurological Institute; PCC = posterior cingulate cortex.

**TABLE S2** Intrinsic Functional Connectivity (iFC) Without Global Signal Regression Group Comparisons (Major Depressive Disorder [MDD] vs. Controls) and Correlations With MDD and Anhedonia Severity (MDD Only)

| Region                               | Seed      | Connectivity Peak                  | Cluster Size | Peak (MNI) |     |     | Peak Z | p      |
|--------------------------------------|-----------|------------------------------------|--------------|------------|-----|-----|--------|--------|
|                                      |           |                                    |              | X          | Y   | Z   |        |        |
| MDD > Controls                       |           |                                    |              |            |     |     |        |        |
| Caudate                              | Left VC   | dmPFC                              | 535          | -12        | 40  | 42  | 4.11   | .005   |
|                                      | Right DC  | dmPFC                              | 2,430        | -12        | 42  | 38  | 4.83   | < .001 |
|                                      | Right VC  | dmPFC and ACC                      | 5,911        | -18        | 40  | 36  | 4.82   | .003   |
| Putamen                              | Left DRP  | dmPFC                              | 903          | 8          | 26  | 52  | 4.10   | < .001 |
|                                      | Right DRP | Inferior frontal gyrus             | 951          | -60        | 28  | 14  | 4.06   | .003   |
|                                      | Right VRP | dmPFC and paracingulate gyrus      | 2,618        | 6          | 24  | 48  | 4.25   | .008   |
| Nucleus Accumbens                    | Left NAc  | dmPFC                              | 425          | -6         | 30  | 56  | 4.02   | .003   |
|                                      | Right NAc | dmPFC                              | 2,945        | -22        | 46  | 26  | 4.69   | .002   |
| Controls > MDD                       |           |                                    |              |            |     |     |        |        |
| Caudate                              | Left DC   | Occipital cuneal cortex            | 771          | 8          | -78 | 30  | 3.78   | .027   |
|                                      | Right DC  | Occipital lingual gyrus            | 877          | -26        | -60 | -2  | 3.88   | .018   |
|                                      | Right DC  | Occipital/temporal fusiform cortex | 763          | 42         | -62 | -22 | 3.55   | .050   |
| Putamen                              | Right VC  | Occipital cuneal cortex            | 2,799        | -22        | -68 | 24  | 4.59   | .037   |
|                                      | Left DRP  | Occipital fusiform cortex          | 867          | 36         | -72 | -18 | 4.45   | .006   |
|                                      | Right DRP | Occipital fusiform cortex          | 1,300        | 36         | -78 | -18 | 4.55   | .050   |
|                                      | Right DRP | Lateral occipital cortex           | 988          | -40        | -90 | 2   | 4.71   | .033   |
| Nucleus Accumbens                    | Right VRP | Occipital fusiform cortex          | 1,172        | -24        | -74 | -10 | 3.89   | .029   |
|                                      | Right NAc | Middle temporal gyrus              | 1,277        | 50         | -54 | -2  | 4.14   | .022   |
|                                      | Right NAc | Middle occipital gyrus             | 722          | 26         | -80 | 14  | 4.16   | .030   |
|                                      | Right NAc | Occipital fusiform gyrus           | 711          | -28        | -60 | -4  | 4.51   | .050   |
| MDD: Positive CDRS-R Correlations    |           |                                    |              |            |     |     |        |        |
| Putamen                              | Right VRP | Precuneus and PCC                  | 889          | -2         | -56 | 32  | 4.19   | .086   |
| MDD: Negative CDRS-R Correlations    |           |                                    |              |            |     |     |        |        |
| Caudate                              | Left DC   | Precuneus and PCC                  | 1,716        | 6          | -66 | 62  | 4.29   | .007   |
|                                      | Left DC   | Middle frontal gyrus               | 709          | 28         | 14  | 52  | 4.09   | .031   |
|                                      | Right DC  | Precuneus and PCC                  | 656          | -4         | -62 | 62  | 4.38   | .020   |
| Putamen                              | Left DRP  | dmPFC                              | 449          | -32        | 42  | 40  | 4.33   | .025   |
|                                      | Left VRP  | Lateral occipital cortex           | 389          | 10         | -66 | 60  | 3.52   | .076   |
|                                      | Right VRP | dmPFC                              | 462          | 46         | 60  | -4  | 4.61   | .041   |
| Nucleus accumbens                    | Right NAc | Precuneus                          | 435          | -6         | -62 | 62  | 3.53   | .094   |
| MDD: Positive Anhedonia Correlations |           |                                    |              |            |     |     |        |        |
| Caudate                              | Left DC   | Supplementary motor area           | 2,248        | 10         | 2   | 52  | 4.18   | .057   |
|                                      | Left VC   | Supplementary motor area           | 679          | 10         | 2   | 52  | 4.14   | .090   |
|                                      | Left VC   | Precuneus                          | 620          | -30        | -52 | 52  | 3.88   | .057   |
|                                      | Right DC  | Middle frontal gyrus               | 600          | -18        | -16 | 54  | 4.92   | .047   |
|                                      | Right VC  | Supramarginal gyrus                | 648          | -54        | -38 | 42  | 3.58   | .042   |
| MDD: Negative Anhedonia Correlations |           |                                    |              |            |     |     |        |        |
| Caudate                              | Right DC  | Precuneus and PCC                  | 1,006        | 30         | -66 | 52  | 4.34   | .017   |
| Nucleus accumbens                    | Left NAc  | Subgenual ACC and left caudate     | 939          | -8         | 10  | 14  | 4.70   | < .001 |

Note: ACC = anterior cingulate cortex; CDRS-R = Children's Depression Rating Scale-Revised; DC = dorsal caudate; DCP = dorsal caudal putamen; dmPFC = dorsomedial prefrontal cortex; DRP = dorsal rostral putamen; MNI = Montreal Neurological Institute; NAc = nucleus accumbens; PCC = posterior cingulate cortex; VC = ventral caudate; VRP = ventral rostral putamen.

**TABLE S3** Intrinsic Functional Connectivity (iFC) Controlled for Mean Framework Displacement (FD) Group Comparisons (Major Depressive Disorder [MDD] vs. Controls) and Correlations With MDD and Anhedonia Severity (MDD Only)

| Region                               | Seed      | Connectivity Peak                  | Cluster Size | Peak (MNI) |     |     | Peak Z | p                        |
|--------------------------------------|-----------|------------------------------------|--------------|------------|-----|-----|--------|--------------------------|
|                                      |           |                                    |              | X          | Y   | Z   |        |                          |
| MDD > Controls                       |           |                                    |              |            |     |     |        |                          |
| Caudate                              | Right DC  | dmPFC                              | 1,899        | -12        | 42  | 38  | 4.73   | 5.48 × 10 <sup>-6</sup>  |
|                                      | Right VC  | dmPFC and ACC                      | 6,117        | -18        | 40  | 36  | 4.74   | 5.88 × 10 <sup>-12</sup> |
| Putamen                              | Left DRP  | dmPFC                              | 1,037        | 8          | 26  | 52  | 3.98   | 1.87 × 10 <sup>-4</sup>  |
|                                      | Right DRP | Inferior frontal gyrus             | 988          | -60        | 28  | 14  | 3.95   | 2.29 × 10 <sup>-3</sup>  |
|                                      | Right VRP | dmPFC and paracingulate gyrus      | 2,615        | 6          | 24  | 48  | 4.08   | 1.79 × 10 <sup>-7</sup>  |
| Nucleus Accumbens                    | Right NAc | dmPFC                              | 3,273        | -18        | 44  | 26  | 4.60   | 1.34 × 10 <sup>-8</sup>  |
| Controls > MDD                       |           |                                    |              |            |     |     |        |                          |
| Caudate                              | Left DC   | Superior temporal gyrus            | 1,379        | -68        | -26 | 12  | 4.59   | 5.85 × 10 <sup>-5</sup>  |
|                                      | Right DC  | Occipital pole                     | 1,735        | -10        | -90 | 26  | 4.41   | 1.41 × 10 <sup>-5</sup>  |
|                                      | Right DC  | Occipital lingual gyrus            | 928          | -26        | -60 | -2  | 3.99   | 2.51 × 10 <sup>-3</sup>  |
|                                      | Right DC  | Occipital/temporal fusiform cortex | 824          | 42         | -62 | -22 | 3.56   | 5.36 × 10 <sup>-3</sup>  |
| Putamen                              | Right VC  | Occipital fusiform cortex          | 4,919        | -36        | -80 | -14 | 4.65   | 3.23 × 10 <sup>-10</sup> |
|                                      | Left DRP  | Occipital fusiform cortex          | 855          | 36         | -72 | -18 | 4.31   | 8.85 × 10 <sup>-4</sup>  |
|                                      | Right DRP | Occipital fusiform cortex          | 1,320        | 36         | -78 | -18 | 4.46   | 2.70 × 10 <sup>-4</sup>  |
|                                      | Right DRP | Lateral occipital cortex           | 1,068        | 34         | -80 | 12  | 4.51   | 1.34 × 10 <sup>-3</sup>  |
|                                      | Right DRP | Lateral occipital cortex           | 1,013        | -40        | -90 | 2   | 4.64   | 1.94 × 10 <sup>-3</sup>  |
|                                      | Right VRP | Lateral occipital cortex           | 3,609        | 30         | -80 | 12  | 4.64   | 1.77 × 10 <sup>-9</sup>  |
|                                      | Right VRP | Occipital lingual gyrus            | 1,275        | -22        | -54 | -8  | 3.77   | 3.11 × 10 <sup>-4</sup>  |
| Nucleus Accumbens                    | Right NAc | Middle temporal gyrus              | 1,156        | 50         | -54 | -2  | 4.00   | 8.41 × 10 <sup>-4</sup>  |
|                                      | Right NAc | Occipital lingual gyrus            | 951          | -28        | -58 | -4  | 4.53   | 3.23 × 10 <sup>-3</sup>  |
| MDD: Positive CDRS-R Correlations    |           |                                    |              |            |     |     |        |                          |
| Caudate                              | Left DC   | Superior temporal gyrus            | 1,008        | -42        | 16  | -36 | 4.03   | 1.85 × 10 <sup>-3</sup>  |
| Putamen                              | Right VRP | Precuneus and PCC                  | 850          | -2         | -56 | 32  | 4.08   | 4.40 × 10 <sup>-4</sup>  |
| MDD: Negative CDRS-R Correlations    |           |                                    |              |            |     |     |        |                          |
| Caudate                              | Left DC   | Precuneus and PCC                  | 1,734        | 6          | -66 | 62  | 4.14   | 2.06 × 10 <sup>-5</sup>  |
|                                      | Right DC  | Precuneus and PCC                  | 706          | -4         | -62 | 62  | 4.28   | 1.64 × 10 <sup>-3</sup>  |
|                                      | Right DC  | dmPFC                              | 595          | -28        | 60  | 26  | 4.29   | 5.29 × 10 <sup>-3</sup>  |
|                                      | Left VRP  | dmPFC                              | 610          | 2          | 68  | 14  | 4.51   | 2.85 × 10 <sup>-3</sup>  |
| Nucleus Accumbens                    | Right NAc | dmPFC                              | 555          | 24         | 12  | 50  | 4.22   | 4.50 × 10 <sup>-3</sup>  |
|                                      | Right NAc | Precuneus                          | 509          | -2         | -62 | 64  | 3.47   | 7.85 × 10 <sup>-3</sup>  |
| MDD: Positive Anhedonia Correlations |           |                                    |              |            |     |     |        |                          |
| Caudate                              | Left DC   | Precentral gyrus                   | 1,382        | -28        | -16 | 66  | 4.17   | 1.98 × 10 <sup>-4</sup>  |
|                                      | Left DC   | Precentral gyrus                   | 1,216        | 20         | -18 | 66  | 3.78   | 5.52 × 10 <sup>-4</sup>  |
|                                      | Right DC  | Left posterior insula              | 1,769        | -44        | -14 | 0   | 4.23   | 7.81 × 10 <sup>-6</sup>  |
|                                      | Right DC  | Right posterior insula             | 1,357        | 50         | -6  | 2   | 4.18   | 1.02 × 10 <sup>-4</sup>  |
| MDD: Negative Anhedonia Correlations |           |                                    |              |            |     |     |        |                          |
| Caudate                              | Left DC   | PCC                                | 1,179        | 2          | -46 | 18  | 3.9    | 6.98 × 10 <sup>-4</sup>  |
|                                      | Right DC  | Precuneus and PCC                  | 1,250        | 30         | -66 | 54  | 4.34   | 2.07 × 10 <sup>-4</sup>  |
| Nucleus Accumbens                    | Left NAc  | Subgenual ACC and left caudate     | 877          | -10        | 10  | 16  | 4.81   | 2.01 × 10 <sup>-3</sup>  |

Note: ACC = anterior cingulate cortex; CDRS-R = Children's Depression Rating Scale-Revised; DC = dorsal caudate; DCP = dorsal caudal putamen; dmPFC = dorsomedial prefrontal cortex; DRP = dorsal rostral putamen; MNI = Montreal Neurological Institute; NAc = nucleus accumbens; PCC = posterior cingulate cortex; VC = ventral caudate; VRP = ventral rostral putamen.

## REFERENCES

1. Kennedy DN, Lange N, Makris N, Bates J, Meyer J, Caviness VS Jr. Gyri of the human neocortex: an MRI-based analysis of volume and variance. *Cereb Cortex*. 1998;8:372-384.
2. Makris N, Meyer JW, Bates JF, Yeterian EH, Kennedy DN, Caviness VS. MRI-based topographic parcellation of human cerebral white matter and nuclei II. Rationale and applications with systematics of cerebral connectivity. *NeuroImage*. 1999;9:18-45.
3. Stark DE, Margulies DS, Shehzad ZE, *et al.* Regional variation in interhemispheric coordination of intrinsic hemodynamic fluctuations. *J Neurosci*. 2008;28:13754-13764.
4. Kelly C, Biswal BB, Craddock RC, Castellanos FX, Milham MP. Characterizing variation in the functional connectome: promise and pitfalls. *Trends Cogn Sci*. 2012;16:181-188.
5. Leopold DA, Maier A. Ongoing physiological processes in the cerebral cortex. *NeuroImage*. 2012;62:2190-2200.
6. Carbonell F, Bellec P, Shmuel A. Global and system-specific resting-state fMRI fluctuations are uncorrelated: principal component analysis reveals anti-correlated networks. *Brain Connect*. 2011;1:496-510.
7. He H, Liu TT. A geometric view of global signal confounds in resting-state functional MRI. *NeuroImage*. 2012;59:2339-2348.
